# Supplementary material for: Escoltar els infants en els serveis d'atenció a la infància
Source: Royal Society of Chemistry journal article supplement (doi:10.1039/b924207d), 2001-01-01
Supplement: b924207d.pdf [file b924207d.pdf]

### General procedure for the synthesis of Ugi adducts:

To a 1 M solution of aldehyde (1 mmol) in methanol were added successively 1 equiv. of amine, 1 equiv. of chloroacetic acid and 1 equiv. of isocyanide. The resulting mixture was stirred at room temperature until completion of starting materials (TLC). Then, potassium *O*-ethylxanthogenate was added and the reaction mixture was stirred at room temperature for 2-3 h. After extraction, the solvent was removed under reduced pressure and the crude reaction mixture was purified by flash column chromatography on silica gel.

### Typical procedure for the alkyne-xanthates cyclizations under reductive conditions:

To a degassed solution of the appropriate alkyne-xanthate adduct (generally 0.3-0.5 mmol) in isopropanol (0.02 M) heated at reflux under argon was added lauroyl peroxide (1 equiv.). When starting material was totally consumed, the reaction mixture was cooled to room temperature and the solvent was removed under reduced pressure. This crude reaction mixture was purified by flash column chromatography on silica gel, using diethyl ether or ethyl acetate/petroleum ether.

### Dithiocarbonic acid *S*-{[(*tert*-butylcarbamoyl-methyl)-prop-2-ynyl-carbamoyl]-methyl} ester *O*-ethyl ester **1a**

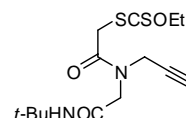

General procedure for this Ugi adduct, using formaldehyde (as a 40% aq. solution). Purification by flash column chromatography (silica gel; petroleum ether-diethyl ether, 20:80) gave **1a** as a 1:1.5 mixture of two rotamers as a yellow oil.

**Yield** 72% (rt, 16h).

**R<sub>f</sub>** 0.3 (80:20 diethyl ether / petroleum ether).

*Major rotamer* :

**<sup>1</sup>H NMR (CDCl<sub>3</sub>, 400 MHz)** δ 5.95 (br s, 1H, NH), 4.68 (q, 2H, *J* = 7.1 Hz, OCH<sub>2</sub>CH<sub>3</sub>), 4.36 (d, 2H, *J* = 2.2 Hz, H-1), 4.19 (s, 2H, H-3), 4.06 (s, 2H, H-4), 2.43 (t, 1H, *J* = 2.2 Hz, H-2), 1.44 (t, 3H, *J* = 7.1 Hz, OCH<sub>2</sub>CH<sub>3</sub>), 1.29 (s, 9H, C(CH<sub>3</sub>)<sub>3</sub>).

*Mixture of rotamers* :

**<sup>13</sup>C NMR (CDCl<sub>3</sub>, 100.6 MHz)** δ 214.46 (C=S), [167.92, 167.88 (C=O)], 168.60 (C=O), 74.47 (CH), 73.92 (Cq), 71.41 (OCH<sub>2</sub>CH<sub>3</sub>), 52.54 (CH<sub>2</sub>), 52.33 (CH<sub>2</sub>), 51.91 (C(CH<sub>3</sub>)<sub>3</sub>), 39.42 (CH<sub>2</sub>), 39.02 (CH<sub>2</sub>), 29.09 (C(CH<sub>3</sub>)<sub>3</sub>), 14.21 (OCH<sub>2</sub>CH<sub>3</sub>).

**MS (DI, CI NH<sub>3</sub>)** *m/z* 331 (M+H<sup>+</sup>).

**HRMS** Calcd. 330.1072, Found 330.1080.

### Dithiocarbonic acid *S*-{[(1-*tert*-butylcarbamoyl-propyl)-prop-2-ynyl-carbamoyl]-methyl} ester *O*-ethyl ester **1b**

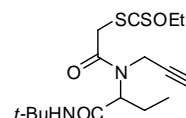

General procedure for this Ugi adduct. Purification by flash column chromatography (silica gel; petroleum ether-diethyl ether, 30:70) gave **1b** as a yellow oil.

**Yield** 70% (rt, 16h).

**R<sub>f</sub>** 0.3 (70:30 diethyl ether / petroleum ether).

**<sup>1</sup>H NMR (CDCl<sub>3</sub>, 400 MHz)** δ 5.98 (br s, 1H, NH), 4.82 (t, 1H, *J* = 8.1 Hz), 4.65 (q, 2H, *J* = 7.1 Hz, OCH<sub>2</sub>CH<sub>3</sub>), 4.31 (d, 1H, *J* = 16.1 Hz), 4.30 (dd, 2H, *J* = 2.4, 9.0 Hz), 4.11 (d, 1H, *J* = 16.1 Hz), 2.38 (t, 1H, *J* = 2.4 Hz), 1.98-1.95 (m, 1H), 1.76-1.74 (m, 1H), 1.38 (t, 3H, *J* = 7.1 Hz, OCH<sub>2</sub>CH<sub>3</sub>), 1.32 (s, 9H), 0.91 (t, 3H, *J* = 7.4 Hz).

**<sup>13</sup>C NMR (CDCl<sub>3</sub>, 100.6 MHz)** δ 214.58 (C=S), 169.43 (C=O), 168.70 (C=O), 79.37 (CH), 73.74 (Cq), 70.83 (OCH<sub>2</sub>CH<sub>3</sub>), 59.98 (CH), 52.01 (Cq), 39.54 (CH<sub>2</sub>), 35.05 (CH<sub>2</sub>), 29.02 (Cq), 21.90 (CH<sub>2</sub>), 14.18 (OCH<sub>2</sub>CH<sub>3</sub>), 11.07 (CH<sub>3</sub>).

**MS (DI, CI NH<sub>3</sub>)** *m/z* 359 (M+H<sup>+</sup>).

**I.R.** (thin film) 3267, 2964, 1645, 1382, 1187, 1086 cm<sup>-1</sup>.

**HRMS** Calcd. 358.1385, Found 358.1380.

**Dithiocarbonic acid *S*-{[(1-*tert*-butylcarbamoyl-cyclopentyl)-prop-2-ynyl-carbamoyl]-methyl} ester *O*-ethyl ester **1c****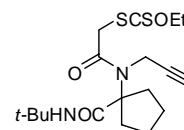

*Ugi reaction under microwaves :*

Propargylamine (1 mmol), cyclopentanone (1 equiv.), chloroacetic acid (1 equiv.), *tert*butylisocyanide (1 equiv.) and methanol (1 mL) were introduced together in the reactor of the microwave apparatus. The reaction mixture, mechanically stirred, was irradiated under an incident power of 50W for 5 min, with a maximum temperature controlled to 50 °C. The reaction mixture was then cooled, potassium *O* ethylxanthogenate (1 equiv.) was added and the reaction mixture was stirred at room temperature for 2 h. After extraction, the solvent was removed under reduced pressure and the crude reaction mixture was purified by flash column chromatography (silica gel ; petroleum ether/diethyl ether, 50:50) to afford **1c** as a white solid.

**Yield** 99%

**mp** 107-108 °C (cyclohexane).

**R<sub>f</sub>** 0.3 (50:50 diethyl ether / petroleum ether).

**<sup>1</sup>H NMR (CDCl<sub>3</sub>, 400 MHz)** δ 6.38 (br s, 1H, *NH*), 4.68 (q, 2H, *J* = 7.1 Hz, OCH<sub>2</sub>CH<sub>3</sub>), 4.30 (br s, 2H), 4.18 (br s, 2H), 2.56-2.54 (m, 2H), 2.47 (br s, 1H), 2.02-2.00 (m, 2H), 1.75-1.70 (m, 4H), 1.43 (t, 3H, *J* = 7.1 Hz, OCH<sub>2</sub>CH<sub>3</sub>), 1.30 (s, 9H).

**<sup>13</sup>C NMR (CDCl<sub>3</sub>, 100.6 MHz)** δ 213.84 (C=S), 168.90 (C=O), 168.80 (C=O), 73.77 (CH), 71.20 (OCH<sub>2</sub>CH<sub>3</sub>), 70.59 (Cq), 57.56 (Cq), 51.52 (C(CH<sub>3</sub>)<sub>3</sub>), 40.74 (CH<sub>2</sub>), 36.32 (CH<sub>2</sub>), 36.18 (CH<sub>2</sub>), 28.91 (C(CH<sub>3</sub>)<sub>3</sub>), 24.06 (CH<sub>2</sub>), 14.22 (OCH<sub>2</sub>CH<sub>3</sub>).

**MS (DI, CI NH<sub>3</sub>) *m/z*** 385 (M+H<sup>+</sup>).

**I.R.** (thin film) 3310, 2885, 1658, 1193 cm<sup>-1</sup>.

**Dithiocarbonic acid *S*-[({1-[2-(3,4-dimethoxy-phenyl)-ethylcarbamoyl]-cyclopentyl}-prop-2-ynyl-carbamoyl)-methyl] ester *O*-ethyl ester **1d****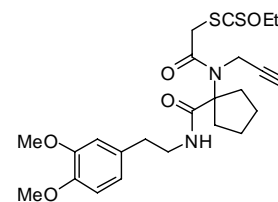

*Ugi reaction under microwaves :* Same procedure as **1c**.

Purification by flash column chromatography (silica gel ; petroleum ether-diethyl ether, 20:80) gave **1d** as a yellow oil.

**Yield** 50%

**R<sub>f</sub>** 0.3 (80:20 diethyl ether / petroleum ether).

**<sup>1</sup>H NMR (CDCl<sub>3</sub>, 400 MHz)** δ 6.79 (d, 1H, *J* = 7.8 Hz), 6.73-6.71 (m, 2H), 6.49 (br t, 1H, *J* = 5.4 Hz, *NH*), 4.63 (q, 2H, *J* = 7.1 Hz, OCH<sub>2</sub>CH<sub>3</sub>), 4.21 (br s, 2H), 4.10 (br s, 2H), 3.87 (s, 3H, OCH<sub>3</sub>), 3.86 (s, 3H, OCH<sub>3</sub>), 3.49-3.44 (m, 2H), 2.72 (t, 2H, *J* = 6.8 Hz), 2.54-2.51 (m, 2H), 2.32 (br s, 1H), 2.00 (br s, 2H), 1.44 (br s, 4H), 1.40 (t, 3H, *J* = 7.1 Hz, OCH<sub>2</sub>CH<sub>3</sub>).

**<sup>13</sup>C NMR (CDCl<sub>3</sub>, 100.6 MHz)** δ 214.42 (C=S), 173.37 (C=O), 168.43 (C=O), 149.27 (Cq), 147.91 (Cq), 132.00 (Cq), 121.15 (CH), 112.32 (CH), 111.56 (CH), 79.70 (Cq), 74.27 (CH), 71.10 (OCH<sub>2</sub>CH<sub>3</sub>), 64.59 (Cq), 56.34 (OCH<sub>3</sub>), 56.30 (OCH<sub>3</sub>), 41.23 (CH<sub>2</sub>), 40.85 (CH<sub>2</sub>), 36.42 (CH<sub>2</sub>), 36.39 (CH<sub>2</sub>), 35.53 (CH<sub>2</sub>), 24.02 (CH<sub>2</sub>), 14.21 (OCH<sub>2</sub>CH<sub>3</sub>).

**MS (DI, CI NH<sub>3</sub>) *m/z*** 493 (M+H<sup>+</sup>).

**I.R.** (thin film) 3295, 2898, 1675, 1187, 1063 cm<sup>-1</sup>.

**Dithiocarbonic acid *S*-([2-(2,3-dimethoxy-phenyl)-ethylcarbamoyl]-[4-methoxy-phenyl]-methyl)-prop-2-ynyl-carbamoyl]-methyl ester *O*-ethyl ester **1e****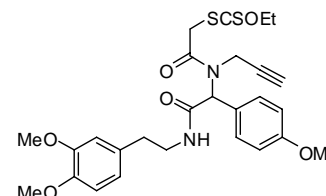

General procedure for this Ugi adduct. Purification by flash column chromatography (silica gel; petroleum ether-diethyl ether, 10:90) gave **1e** as a yellow oil.

**Yield** 40% (rt, 16h).

**R<sub>f</sub>** 0.3 (90:10 diethyl ether / petroleum ether).

**<sup>1</sup>H NMR (CDCl<sub>3</sub>, 400 MHz)** δ 7.24 (d, 2H, *J* = 8.4 Hz, Har), 6.87 (d, 2H, *J* = 8.4 Hz), 6.79-6.70 (m, 3H), 6.36 (br t, 1H, *J* = 5.1 Hz, *NH*), 6.16 (s, 1H), 4.64 (q, 2H, *J* = 7.1 Hz, OCH<sub>2</sub>CH<sub>3</sub>), 4.26- 4.12 (m,

4H), 3.85 (s, 3H, OCH<sub>3</sub>), 3.82 (s, 3H, OCH<sub>3</sub>), 3.81 (s, 3H, OCH<sub>3</sub>), 3.60-3.56 (m, 1H), 3.49-3.46 (m, 1H), 2.77 (t, 2H, *J* = 6.9 Hz), 2.14 (t, 1H, *J* = 2.2 Hz), 1.38 (t, 3H, *J* = 7.1 Hz, OCH<sub>2</sub>CH<sub>3</sub>).

<sup>13</sup>C NMR (CDCl<sub>3</sub>, 100.6 MHz) δ 214.03 (C=S), 169.54 (C=O), 168.36 (C=O), 160.17 (Cq), 149.30 (Cq), 147.98 (Cq), 131.66 (Cq), 131.16 (CH), 126.43 (CH), 121.15 (CH), 114.56 (CH), 112.35 (CH), 111.63 (CH), 79.32 (CH), 73.04 (Cq), 71.05 (OCH<sub>2</sub>CH<sub>3</sub>), 61.31 (CH), 56.29 (OCH<sub>3</sub>), 56.22 (OCH<sub>3</sub>), 55.71 (OCH<sub>3</sub>), 41.32 (CH<sub>2</sub>), 39.93 (CH<sub>2</sub>), 35.81 (CH<sub>2</sub>), 35.68 (CH<sub>2</sub>), 14.18 (OCH<sub>2</sub>CH<sub>3</sub>).

MS (DI, CI NH<sub>3</sub>) *m/z* 545 (M+H<sup>+</sup>).

I.R. (thin film) 3289, 2956, 1656, 1634, 1390, 1275, 1054 cm<sup>-1</sup>.

HRMS Calcd. 544.1702, Found 544.1707.

### *N*-*tert*-Butyl-2-(4-methylene-2-oxo-pyrrolidin-1-yl)-acetamide **2a**

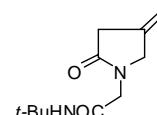

General procedure for this alkyne-xanthate cyclization under reductive conditions, using adduct **1a**. Purification by flash column chromatography (silica gel; petroleum ether-diethyl ether, 30:70) gave **2a** as a yellow oil.

Yield 68% (16h).

R<sub>f</sub> 0.2 (70:30 diethyl ether / petroleum ether).

<sup>1</sup>H NMR (CDCl<sub>3</sub>, 400 MHz) δ 5.86 (br s, 1H, NH), 5.15 (pent., 2H, *J* = 2.5 Hz), 4.16-4.14 (m, 2H), 3.85 (s, 2H), 3.19-3.18 (m, 2H), 1.38 (s, 9H, C(CH<sub>3</sub>)<sub>3</sub>).

<sup>13</sup>C NMR (CDCl<sub>3</sub>, 100.6 MHz) δ 174.04 (C=O), 167.32 (C=O), 136.60 (Cq), 110.26 (CH<sub>2</sub>), 54.36 (CH<sub>2</sub>), 51.93 (C(CH<sub>3</sub>)<sub>3</sub>), 48.00 (CH<sub>2</sub>), 37.34 (CH<sub>2</sub>), 29.10 (C(CH<sub>3</sub>)<sub>3</sub>).

MS (DI, CI NH<sub>3</sub>) *m/z* 211 (M+H<sup>+</sup>).

HRMS Calcd. 210.1368, Found 210.1362.

### *N*-*tert*-Butyl-2-(4-methylene-2-oxo-pyrrolidin-1-yl)-butyramide **2b**

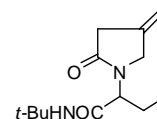

General procedure for this alkyne-xanthate cyclization under reductive conditions, using adduct **1b**. Purification by flash column chromatography (silica gel; petroleum ether-diethyl ether, 30:70) gave **2b** as a yellow oil.

Yield 88% (16h).

R<sub>f</sub> 0.3 (80:20 diethyl ether / petroleum ether).

<sup>1</sup>H NMR (CDCl<sub>3</sub>, 400 MHz) δ 5.88 (br s, 1H, NH), 5.13 (pent., 2H, *J* = 2.4 Hz), 4.39 (t, 1H, *J* = 7.5 Hz), 4.14 (dd, 1H, *J* = 2.4, 14.2 Hz), 4.02 (dd, 1H, *J* = 2.4, 14.2 Hz), 3.20-3.18 (m, 2H), 1.96-1.93 (m, 1H), 1.70-1.68 (m, 1H), 1.29 (s, 9H), 0.92 (t, 3H, *J* = 7.4 Hz).

<sup>13</sup>C NMR (CDCl<sub>3</sub>, 100.6 MHz) δ 173.95 (C=O), 169.26 (C=O), 136.92 (Cq), 110.05 (CH<sub>2</sub>), 57.44 (CH), 51.81 (C(CH<sub>3</sub>)<sub>3</sub>), 49.92 (CH<sub>2</sub>), 37.97 (CH<sub>2</sub>), 29.10 (C(CH<sub>3</sub>)<sub>3</sub>), 21.54 (CH<sub>2</sub>), 11.89 (CH<sub>3</sub>).

MS (DI, CI NH<sub>3</sub>) *m/z* 239 (M+H<sup>+</sup>).

I.R. (thin film) 2945, 1678, 1543, 1456, 1230, 1012 cm<sup>-1</sup>.

HRMS Calcd. 238.1681, Found 238.1678.

### 1-(4-Methylene-2-oxo-pyrrolidin-1-yl)-cyclopentanecarboxylic acid *tert*-butylamide **2c**

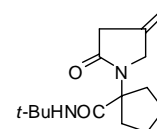

*Alkyne-xanthate cyclization under microwaves :*

A stirred solution of xanthate **1c** (0.04 mmol) and dilauroyl peroxide (1 equiv.) in isopropanol (2 ml) was irradiated under an incident power of 50W for 20 min, with a maximum temperature programmed at 90 °C. The reaction mixture was then cooled, concentrated and purified by flash column chromatography (silica gel ; petroleum ether-diethyl ether, 20:80) to afford **2c** as a yellow oil.

Yield 61%

R<sub>f</sub> 0.2 (80:20 diethyl ether / petroleum ether).

**<sup>1</sup>H NMR (CDCl<sub>3</sub>, 400 MHz)** δ 6.86 (br s, 1H, NH), 5.09 (pent., 2H, *J* = 2.4 Hz), 4.13 (t, 2H, *J* = 2.4 Hz), 3.18 (t, 2H, *J* = 2.4 Hz), 2.50-2.43 (m, 2H), 2.10-2.03 (m, 2H), 1.72-1.69 (m, 4H), 1.33 (s, 9H).  
**<sup>13</sup>C NMR (CDCl<sub>3</sub>, 100.6 MHz)** δ 173.45 (C=O), 168.32 (C=O), 136.89 (Cq), 109.75 (CH<sub>2</sub>), 57.46 (Cq), 53.19 (CH<sub>2</sub>), 51.37 (C(CH<sub>3</sub>)<sub>3</sub>), 39.13 (CH<sub>2</sub>), 35.21 (CH<sub>2</sub>), 29.07 (C(CH<sub>3</sub>)<sub>3</sub>), 23.00 (CH<sub>2</sub>).  
**MS (DI, CI NH<sub>3</sub>)** *m/z* 265 (M+H<sup>+</sup>).  
**HRMS** Calcd. 264.1838, Found 264.1843.

**1-(4-Methylene-2-oxo-pyrrolidin-1-yl)-cyclopentanecarboxylic acid [2-(3,4-dimethoxyphenyl)-ethyl]-amide **2d**.**

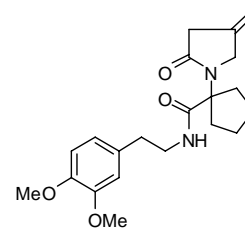

*Alkyne-xanthate cyclization under microwaves* : Same procedure as **2c**.

Purification by flash column chromatography (silica gel ; petroleum ether-diethyl ether, 10:90) gave **2d** as a yellow oil.

**Yield** 77%.

**R<sub>f</sub>** 0.2 (90:10 diethyl ether / petroleum ether).

**<sup>1</sup>H NMR (CDCl<sub>3</sub>, 400 MHz)** δ 6.97 (br t, 1H, *J* = 5.1 Hz, NH), 6.80-6.75 (m, 3H), 5.05 (pent., 2H, *J* = 2.5 Hz), 4.02 (br s, 2H), 3.87 (s, 3H, OCH<sub>3</sub>), 3.86 (s, 3H, OCH<sub>3</sub>), 3.51 (ddd, 2H, *J* = 5.1, 7.1, 12.9 Hz), 3.06 (br s, 2H), 2.77 (t, 2H, *J* = 7.1 Hz), 2.45-2.43 (m, 2H), 2.06-2.03 (m, 2H), 1.69-1.65 (m, 4H).

**<sup>13</sup>C NMR (CDCl<sub>3</sub>, 100.6 MHz)** δ 174.85 (C=O), 173.14 (C=O), 149.23 (Cq), 147.87 (Cq), 136.76 (Cq), 131.79 (Cq), 120.93 (CH), 112.18 (CH), 111.48 (CH), 109.72 (CH<sub>2</sub>), 70.57 (Cq), 56.26 (OCH<sub>3</sub>), 56.24 (OCH<sub>3</sub>), 53.09 (CH<sub>2</sub>), 40.95 (CH<sub>2</sub>), 38.92 (CH<sub>2</sub>), 35.52 (CH<sub>2</sub>), 35.35 (CH<sub>2</sub>), 23.11 (CH<sub>2</sub>).

**MS (DI, CI NH<sub>3</sub>)** *m/z* 373 (M+H<sup>+</sup>).

**HRMS** Calcd. 372.2049, Found 372.2055.

***N*-[2-(3,4-Dimethoxy-phenyl)-ethyl]-2-(4-methoxy-phenyl)-2-(4-methylene-2-oxopyrrolidin-1-yl) acetamide **2e****

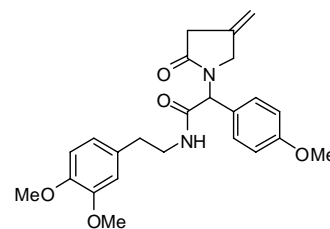

General procedure for this alkyne-xanthate cyclization under reductive conditions, using adduct **1e**. Purification by flash column chromatography (silica gel; petroleum ether-diethyl ether, 10:90) gave **2e** as a yellow oil.

**Yield** 60% (16h).

**R<sub>f</sub>** 0.3 (90:10 diethyl ether / petroleum ether).

**<sup>1</sup>H NMR (CDCl<sub>3</sub>, 400 MHz)** δ 7.22 (d, 2H, *J* = 8.7 Hz), 6.88 (d, 2H, *J* = 8.7 Hz), 6.78 (d, 1H, *J* = 8.7 Hz), 6.70-6.68 (m, 2H), 5.82 (br t, 1H, *J* = 6.3 Hz, NH), 5.79 (s, 1H), 5.06 (pent., 1H, *J* = 2.2 Hz), 4.99 (pent., 1H, *J* = 2.3 Hz), 4.32 (br d, 1H, *J* = 13.9 Hz), 3.87 (s, 3H, OCH<sub>3</sub>), 3.83 (s, 6H, OCH<sub>3</sub>), 3.65-3.56 (m, 2H), 3.49 (dt, 1H, *J* = 6.3, 12.9 Hz), 3.22 (ddd, 1H, *J* = 2.2, 2.3, 14.3 Hz), 3.13 (ddd, 1H, *J* = 2.2, 2.3, 21.3 Hz), 2.76 (t, 2H, *J* = 7.1 Hz).

**<sup>13</sup>C NMR (CDCl<sub>3</sub>, 100.6 MHz)** δ 173.51 (C=O), 169.44 (C=O), 160.18 (Cq), 149.38 (Cq), 148.06 (Cq), 137.08 (Cq), 131.39 (Cq), 130.86 (CH<sub>2</sub>), 126.36 (Cq), 121.03 (CH), 114.68 (CH), 112.19 (CH), 111.65 (CH), 109.66 (CH), 58.41 (CH), 56.29 (OCH<sub>3</sub>), 56.20 (OCH<sub>3</sub>), 55.73 (OCH<sub>3</sub>), 50.96 (CH<sub>2</sub>), 41.22 (CH<sub>2</sub>), 37.92 (CH<sub>2</sub>), 35.57 (CH<sub>2</sub>).

**MS (DI, CI NH<sub>3</sub>)** *m/z* 425 (M+H<sup>+</sup>).

**I.R.** (thin film) 2865, 1663, 1578, 1125, 1026 cm<sup>-1</sup>.

**HRMS** Calcd. 424.1998, Found 424.2003.

## General procedure for the synthesis of alkyne-xanthate adducts (**1f**, **1g**, **1h**, **1i**):

To a solution of starting amine (5 equiv.) in dichloromethane (0.5 M) was added the bromoalkyne (1 equiv.) dropwise with stirring at room temperature for 3h. To the mixture obtained after filtration and evaporation of the residual amine and solvent, were added dichloromethane (0.5 M) and ethyldiisopropyl-amine (1 equiv.). To this solution was then added dropwise chloroacetyl chloride (1 equiv) at 0°C for 2h. After extraction (H<sub>2</sub>O/dichloromethane) and evaporation of the solvent, the product was dissolved in ethanol (1 M) and potassium *O*-ethylxanthogenate (1 equiv.) was added, this reaction mixture was then stirred at room temperature for 4 h. After extraction and removal of the solvent under reduced pressure, the starting xanthates were purified by flash column chromatography (silica gel ; petroleum ether/diethyl ether).

### Dithiocarbonic acid *O*-ethyl ester *S*-{[(2-methoxy-ethyl)-prop-2-ynyl-carbamoyl]-methyl} ester **1f**.

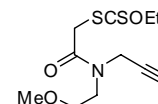

General procedure for the formation of this alkyne-xanthate adduct, obtained as a yellow oil, as a 1:1.6 mixture of two rotamers.

**Yield** 57% (over the 3 steps)

**R<sub>f</sub>** 0.3 (70:30 diethyl ether / petroleum ether).

*Major rotamer :*

**<sup>1</sup>H NMR (CDCl<sub>3</sub>, 400 MHz)** δ 4.66 (q, 2H, *J* = 7.1 Hz, OCH<sub>2</sub>CH<sub>3</sub>), 4.33 (d, 2H, *J* = 2.4 Hz), 4.24 (s, 2H), 3.77 (t, 2H, *J* = 5.4 Hz), 3.63 (t, 2H, *J* = 5.4 Hz), 3.38 (s, 3H, OCH<sub>3</sub>), 2.25 (t, 1H, *J* = 2.4 Hz), 1.44 (t, 3H, *J* = 7.1 Hz, OCH<sub>2</sub>CH<sub>3</sub>).

*Mixture of rotamers :*

**<sup>13</sup>C NMR (CDCl<sub>3</sub>, 100.6 MHz)** δ 214.38 (C=S), 167.43 (C=O), 82.93 (C<sub>q</sub>), 72.82 (CH), 71.58 (CH<sub>2</sub>), 70.82 (OCH<sub>2</sub>CH<sub>3</sub>), 59.50 (CH<sub>2</sub>), 58.85 (CH<sub>2</sub>), 47.56 (CH<sub>2</sub>), 47.12 (CH<sub>2</sub>), 39.79 (CH<sub>2</sub>), 39.72 (CH<sub>2</sub>), 35.66 (CH<sub>2</sub>), 14.12 (OCH<sub>2</sub>CH<sub>3</sub>).

**MS (DI, CI NH<sub>3</sub>)** *m/z* 276 (M+H<sup>+</sup>).

### Dithiocarbonic acid *S*-[(*tert*-butyl-prop-2-ynyl-carbamoyl)-methyl] ester *O*-ethyl ester **1g**.

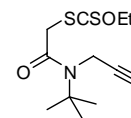

General procedure for the formation of this alkyne-xanthate adduct, obtained as a yellow solid.

**Yield** 55% (over the 3 steps)

**R<sub>f</sub>** 0.3 (80:20 diethyl ether / petroleum ether).

**<sup>1</sup>H NMR (CDCl<sub>3</sub>, 400 MHz)** δ 4.66 (q, 2H, *J* = 7.1 Hz, OCH<sub>2</sub>CH<sub>3</sub>), 4.25 (s, 2H), 4.19 (d, 2H, *J* = 2.4 Hz), 2.37 (t, 1H, *J* = 2.4 Hz), 1.52 (s, 9H), 1.44 (t, 3H, *J* = 7.1 Hz, OCH<sub>2</sub>CH<sub>3</sub>).

**<sup>13</sup>C NMR (CDCl<sub>3</sub>, 100.6 MHz)** δ 214.40 (C=S), 167.32 (C=O), 80.43 (C<sub>q</sub>), 73.22 (CH), 70.78 (OCH<sub>2</sub>CH<sub>3</sub>), 59.28 (C(CH<sub>3</sub>)<sub>3</sub>), 42.89 (CH<sub>2</sub>), 35.46 (CH<sub>2</sub>), 28.98 (C(CH<sub>3</sub>)<sub>3</sub>), 14.22 (OCH<sub>2</sub>CH<sub>3</sub>).

**MS (DI, CI NH<sub>3</sub>)** *m/z* 274 (M+H<sup>+</sup>).

### 1-(2-Methoxy-ethyl)-4-methylene-pyrrolidin-2-one **2f**

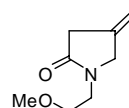

General procedure for this alkyne-xanthate cyclization under reductive conditions, using adduct **1f**. Purification by flash column chromatography (silica gel; petroleum ether-diethyl ether, 60:40) gave **2f** as a yellow oil.

**Yield** 45% (4h).

**R<sub>f</sub>** 0.3 (60:40 diethyl ether / petroleum ether).

**<sup>1</sup>H NMR (CDCl<sub>3</sub>, 400 MHz)** δ 5.15 (pent., 2H, *J* = 2.3 Hz), 4.16-4.12 (m, 2H), 3.57-3.53 (m, 4H), 3.37 (s, 3H, OCH<sub>3</sub>), 3.16-3.12 (m, 2H).

$^{13}\text{C}$  NMR ( $\text{CDCl}_3$ , 100.6 MHz)  $\delta$  173.32 (C=O), 137.71 (Cq), 109.39 ( $\text{CH}_2$ ), 71.29 ( $\text{CH}_2$ ), 59.15 ( $\text{OCH}_3$ ), 54.60 ( $\text{CH}_2$ ), 42.63 ( $\text{CH}_2$ ), 37.77 ( $\text{CH}_2$ ).

MS (DI, CI  $\text{NH}_3$ )  $m/z$  156 (M+H<sup>+</sup>).

I.R. (thin film) 2935, 1586, 1176, 1043  $\text{cm}^{-1}$ .

HRMS calcd for  $\text{C}_8\text{H}_{13}\text{NO}_2$ : 155.0946, found: 155.0941.

**1-tert-Butyl-4-methylene-pyrrolidin-2-one 2g.**

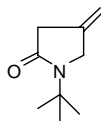

General procedure for this alkyne-xanthate cyclization under reductive conditions, using adduct **1g**. Purification by flash column chromatography (silica gel; petroleum ether-diethyl ether, 50:50) gave **2g** as a yellow oil.

Yield 45% (4h).

R<sub>f</sub> 0.4 (60:40 diethyl ether / petroleum ether).

$^1\text{H}$  NMR ( $\text{CDCl}_3$ , 400 MHz)  $\delta$  5.03 (pent., 2H,  $J = 2.5$  Hz), 4.12-4.10 (m, 2H), 3.13-3.11 (m, 2H), 1.43 (s, 9H).

$^{13}\text{C}$  NMR ( $\text{CDCl}_3$ , 100.6 MHz)  $\delta$  173.40 (C=O), 137.87 (Cq), 108.83 ( $\text{CH}_2$ ), 54.51 ( $\text{C}(\text{CH}_3)_3$ ), 52.04 ( $\text{CH}_2$ ), 39.79 ( $\text{CH}_2$ ), 28.08 ( $\text{C}(\text{CH}_3)_3$ ).

MS (DI, CI  $\text{NH}_3$ )  $m/z$  154 (M+H<sup>+</sup>).

I.R. (thin film) 2942, 1654, 1234, 1056  $\text{cm}^{-1}$ .

HRMS calcd for  $\text{C}_9\text{H}_{15}\text{NO}$ : 153.1154, found: 153.1148.

**Dithiocarbonic acid S-(1-tert-butyl-5-oxo-2,5-dihydro-1H-pyrrol-3-ylmethyl) ester O-ethyl ester 3g.**

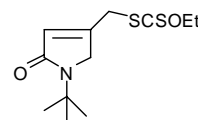

General procedure for this alkyne-xanthate cyclization under reductive conditions, using adduct **1g**. Purification by flash column chromatography (silica gel; petroleum ether-diethyl ether, 50:50) gave **3g** (yellow oil), as a side product obtained with **2g**.

Yield 8% (4h).

R<sub>f</sub> 0.2 (90:10 diethyl ether / petroleum ether).

$^1\text{H}$  NMR ( $\text{CDCl}_3$ , 400 MHz)  $\delta$  6.02 (s, 1H), 4.68 (q, 2H,  $J = 7.1$  Hz,  $\text{OCH}_2\text{CH}_3$ ), 4.10 (s, 2H), 4.02 (s, 2H, H-3), 1.43 (t, 3H,  $J = 7.1$  Hz,  $\text{OCH}_2\text{CH}_3$ ), 1.30 (s, 9H).

$^{13}\text{C}$  NMR ( $\text{CDCl}_3$ , 100.6 MHz)  $\delta$  213.18 (C=S), 171.59 (C=O), 151.83 (Cq), 127.52 (CH), 71.19 ( $\text{OCH}_2\text{CH}_3$ ), 54.42 ( $\text{C}(\text{CH}_3)_3$ ), 52.72 ( $\text{CH}_2$ ), 34.74 ( $\text{CH}_2$ ), 28.81 ( $\text{C}(\text{CH}_3)_3$ ), 14.21 ( $\text{OCH}_2\text{CH}_3$ ).

MS (DI, CI  $\text{NH}_3$ )  $m/z$  274 (M+H<sup>+</sup>).

I.R. (thin film) 3034, 2935, 1664, 1175, 1049  $\text{cm}^{-1}$ .

**General procedure for the formation of xanthates 1j,1k,1l.**

A solution of the 1-azido-but-4-yne (185 mg, 2 mmol) in ether (6 mL) was cooled at 0 °C. Then triphenyl phosphine (765.35 mg, 3 mmol) was added to the solution and stirred at room temperature overnight. Solvent was removed under reduced pressure and the residue was dissolved in methanol anhydrous (9 mL). The aldehyde (2.1 mmol) was added and the reaction mixture stirred for 1 hour. Then chloroacetic acid monohydrate (2 mmol) and *t*-butyl isocyanide (2 mmol) was added to the reaction mixture and stirred for 48 hours. Potassium ethyl xanthogenate (2.3 mmol) was added to the reaction mixture and stirred for 1 hour. Methanol was removed under reduced pressure. The crude residue was purified by flash column chromatography.

**S-2-(But-3-ynyl(2-(tert-butylamino)-2-oxoethyl)amino)-2-oxoethyl-O-ethyl carbonodithioate 1j.**

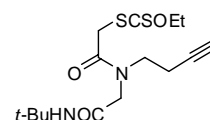

General procedure with formaldehyde. Purification by flash column chromatography (6:4 hexane/EtOAc) to give **1j** (45%) as a pale yellow solid:

**mp** 82-83 °C.

**R<sub>f</sub>** 0.3 (60:40 hexane / ethyl acetate).

**<sup>1</sup>HNMR** (300 MHz, CDCl<sub>3</sub>) δ (ppm) 6.20 (bs, 1H), 4.65 (q, J=7.2 Hz, 2H), 4.25 (s, 2H), 3.95 (s, 2H), 3.74 (t, J=6.6 Hz, 2H), 2.61 (td, J=2.7 Hz, J=6.6 Hz, 2H), 2.09 (t, J=2.7 Hz, 1H), 1.43 (t, J=7.2 Hz, 3H), 1.32 (s, 9H). Rotamer (3:1) 5.95, 4.13, 4.03, 3.58, 2.49, 2.02, 1.39.

**<sup>13</sup>CNMR** (75.4 MHz, CDCl<sub>3</sub>) δ (ppm) 213.88 (C=S), 167.33 (C=O), 166.52 (C=O), 81.46 (C≡C), 71.58 (OCH<sub>2</sub>), 70.76 (HC≡C), 52.52 (CH<sub>2</sub>N), 51.25 (C(CH<sub>3</sub>)<sub>3</sub>), 48.41(CH<sub>2</sub>N), 38.81 (CH<sub>2</sub>S), 28.66 (C(CH<sub>3</sub>)<sub>3</sub>), 18.64 (CH<sub>2</sub>), 13.70 (CH<sub>3</sub>).

**IR** γ (cm<sup>-1</sup>) 640.33 (C=C-H), 1050.59 (C-O-C), 1225.41 (C=S), 1393.48, 1364.83, 1451.74 (C-H), 1647.2 (C=O), 2970.86, 2932.91 (C-H), 3307.5 (N-H).

**HRMS (FAB+)** calcd for C<sub>15</sub>H<sub>25</sub>N<sub>2</sub>O<sub>3</sub>S<sub>2</sub>: [M+1] 345.1307, found: 345.1308.

**S-2-(But-3-ynyl(1-(tert-butylamino)-1-oxobutan-2-yl)amino)-2-oxoethyl-O-ethyl carbonodithioate 1k.**

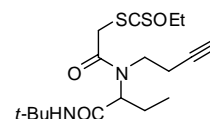

General procedure with propionaldehyde. Purification by flash column chromatography (8:2 hexane/EtOAc) to give **1k** (60%) as a yellow oil:

**R<sub>f</sub>** 0.5 (70:30 hexane / ethyl acetate).

**<sup>1</sup>HNMR** (300 MHz, CDCl<sub>3</sub>) δ (ppm) 6.30 (bs, 1H), 4.65 (q, J=7.2 Hz, 2H), 4.59 (t, J=8.1 Hz, 1H), 4.31 (d, J=15.6, 1H), 4.23 (d, J=15.6, 1H), 3.76-3.55 (m, 2H), 2.59 (td, J=7.5 Hz, J= 2.7 Hz, 2H), 2.05-1.93 (m, 1H), 1.75-1.60 (m, 1H), 2.07 (t, J=2.7 Hz, 1H), 1.43 (t, J=7.2 Hz, 3H), 1.31 (s, 9H), 0.89 (t, J=7.5 Hz, 3H).

**<sup>13</sup>CNMR** (75.4 MHz, CDCl<sub>3</sub>) δ (ppm) 213.81 (C=S), 169.66 (C=O), 168.67 (C=O), 80.70 (C≡C), 71.51 (OCH<sub>2</sub>), 70.72 (HC≡C), 60.41(CHN), 51.17 (C(CH<sub>3</sub>)<sub>3</sub>), 43.70 (CH<sub>2</sub>N), 39.67 (CH<sub>2</sub>S), 28.52 (C(CH<sub>3</sub>)<sub>3</sub>), 21.03 (CH<sub>2</sub>), 19.62 (CH<sub>2</sub>), 13.76 (CH<sub>3</sub>), 10.57 (CH<sub>3</sub>).

**IR** γ (cm<sup>-1</sup>) 642.6, 1113.3, 1226.2, 1390.1, 1412, 1455, 1676.8, 1642.6, 2934.2, 2969.4, 3307.8.

**HRMS (FAB+)** calcd for C<sub>17</sub>H<sub>28</sub>N<sub>2</sub>O<sub>3</sub>S<sub>2</sub>: [M+1] 372.1541, found: 372.1541.

**S-2-(But-3-ynyl(2-(tert-butylamino)-1-(4-methoxyphenyl)-2-oxoethyl)amino)-2-oxoethyl O-ethyl carbonodithioate 1l.**

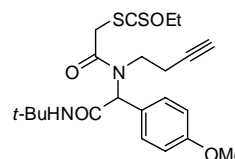

General procedure with *p*-methoxybenzaldehyde. Purification by flash column chromatography (7:3 hexane/EtOAc) to give **1l** (50%) as a yellow solid:

**mp** 108-109 °C.

**R<sub>f</sub>** 0.4 (60:40 hexane / ethyl acetate).

**<sup>1</sup>HNMR** (300 MHz, CDCl<sub>3</sub>) δ (ppm) 7.33 (d, J=8.7 Hz, 2H), 6.90 (d, J=8.4 Hz, 2H), 5.81 (s, 1H), 5.64 (bs, 1H), 4.65 (q, J=7.2 Hz, 2H), 4.26 (s, 2H), 3.82 (s, 3H), 3.73-3.55 (m, 2H), 2.31-2.16 (m, 2H), 1.97 (s, 1H), 1.42 (t, J=7.2 Hz, 3H), 1.33 (s, 9H).

**<sup>13</sup>CNMR** (75.4 MHz, CDCl<sub>3</sub>) δ (ppm) 213.75 (C=S), 168.61 (C=O), 167.77 (C=O), 159.88 (O-C=C), 130.86 (HC=C), 125.56 (C=C), 114.39 (HC=C), 80.76 (C≡C), 70.82 (OCH<sub>2</sub>), 70.51(HC≡C), 62.17 (CHN), 55.28 (CH<sub>3</sub>O), 51.62 (C(CH<sub>3</sub>)<sub>3</sub>), 44.86 (CH<sub>2</sub>N), 39.66 (CH<sub>2</sub>S), 28.58 (C(CH<sub>3</sub>)<sub>3</sub>), 19.65 (CH<sub>2</sub>), 13.75 (CH<sub>3</sub>).

**IR** γ (cm<sup>-1</sup>) 640.1, 1049.3, 1226.3, 1249.4, 1364.2, 1394.9, 1417.5, 1454, 1513.1, 1644.2, 1681.3, 2933.4, 2969.4, 3071.3, 3304.1.

**HRMS (FAB+)** calcd for C<sub>22</sub>H<sub>31</sub>N<sub>2</sub>O<sub>4</sub>S<sub>2</sub>: [M+1] 451.1725, found: 451.1726.

### Synthesis of pyrazinone **4k**.

A deaerated solution xanthate **1k** (1 mmol) in isopropanol (3 mL) was heated at reflux while dilauroyl peroxide (1.2 mmol) was added portionwise (0.12 mmol/h). After completion (10h), the solution was cooled and the isopropanol evaporated under reduced pressure. The residue was purified by flash chromatography (8:2 hexane/EtOAc) to give **4k** (58%) as a yellow oil.

### *N*-tert-Butyl-2-(4-methyl-2-oxo-5,6-dihydropyridin-1(2*H*)-yl)butanamide **4k**.

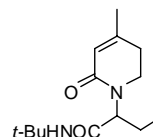

**R<sub>f</sub>** 0.2 (70:30 hexane / ethyl acetate).

**<sup>1</sup>H NMR** (300 MHz, CDCl<sub>3</sub>) δ (ppm) 5.99 (bs, 1H), 5.77 (dd, J=2.7 Hz, 1.5 Hz 1H), 4.81 (dd, J=8.7 Hz, 6.9 Hz, 1H), 3.35 (t, J=7.2 Hz, 2H), 2.30-2.24 (m, 2H), 1.92 (s, 3H), 1.71-1.58 (m, 2H), 1.31 (s, 9H), 0.88 (t, J=7.2 Hz, 3H).

**<sup>13</sup>C NMR** (75.4 MHz, CDCl<sub>3</sub>) δ (ppm) 169.97 (C=O), 165.87 (C=O), 151.76 (C=C), 120.43 (C=C), 57.18 (CHN), 51.09 (C(CH<sub>3</sub>)<sub>3</sub>), 40.19 (CH<sub>2</sub>N), 29.59 (CH<sub>2</sub>), 28.68 (C(CH<sub>3</sub>)<sub>3</sub>), 22.73 (CH<sub>2</sub>), 20.40 (CH<sub>3</sub>), 10.62 (CH<sub>3</sub>).

**IR** γ (cm<sup>-1</sup>) 858.1, 1364.3, 1438.5, 1453.8, 1547.7, 1612.1, 1666.9, 2933.3, 2968.0, 3312.6.

**HRMS (FAB+)** calcd for C<sub>14</sub>H<sub>24</sub>N<sub>2</sub>O<sub>2</sub>: [M+1] 253.1916, found: 253.1911.

### General procedure for the preparation of piperazinones **4l** and **4j**.

A deaerated solution of the corresponding xanthate (1 mmol) in isopropanol (3 mL) was heated at reflux, and 1.2 mmol of dilauroyl peroxide was added portionwise (0.12 mmol/h). After completion (10h), 0.1 mmol of DBU was added to the solution and heated at reflux by 3 h. After that the solution was cooled and the isopropanol evaporated under reduced pressure. The residue was purified by a silica gel column chromatography.

### *N*-tert-Butyl-2-(4-methoxyphenyl)-2-(4-methyl-2-oxo-5,6-dihydropyridin-1(2*H*)-yl)acetamide **4l**.

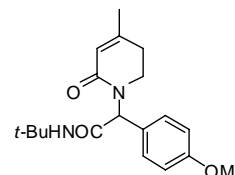

This residue was purified by flash chromatography (6:4 hexane/EtOAc) to give **4l** (30%) as a pale yellow solid:

**mp** 157-158 °C.

**R<sub>f</sub>** 0.2 (50:50 hexane / ethyl acetate).

**<sup>1</sup>H NMR** (300 MHz, CDCl<sub>3</sub>) δ (ppm) 7.29 (d, J=9 Hz, 2H), 6.88 (d, J=8.4 Hz, 2H), 6.14 (s, 1H), 5.76 (dd, J=3 Hz, 1.5 Hz, 1H), 5.63 (bs, 1H), 3.81 (s, 3H), 3.64-3.55 (m, 1H), 3.04-2.95 (m, 1H), 2.37-2.26 (m, 1H), 2.16-2.04 (m, 1H), 1.84 (s, 3H), 1.36 (s, 9H).

**<sup>13</sup>C NMR** (75.4 MHz, CDCl<sub>3</sub>) δ (ppm) 169.15 (C=O), 165.51 (C=O), 159.41 (O-C=C), 151.96 (C=C), 130.32 (HC=C), 127.75 (C=C), 120.36 (C=C), 114.07 (HC=C), 58.82 (CHN), 55.28 (CH<sub>3</sub>O), 51.61 (C(CH<sub>3</sub>)<sub>3</sub>), 41.98 (CH<sub>2</sub>N), 29.80 (CH<sub>2</sub>), 28.71 (C(CH<sub>3</sub>)<sub>3</sub>), 22.72 (CH<sub>3</sub>).

**IR** γ (cm<sup>-1</sup>) 653.4, 809.5, 1034.8, 1173.2, 1250.3, 1329.6, 1443, 1470.3, 1510, 1552, 1609.4, 1664.7, 2931.2, 2959.9, 3070.2, 3279.63.

**HRMS (FAB+)** calcd for C<sub>19</sub>H<sub>26</sub>N<sub>2</sub>O<sub>3</sub>: [M+1] 331.2022, found: 331.2025.



***N*-tert-Butyl-2-(4-methyl-2-oxo-5,6-dihydropyridin-1(2*H*)-yl)acetamide 4j.**

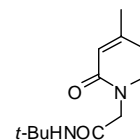

This residue was purified by flash chromatography (EtOAc) to give the mixture (40%) as a pale yellow solid

**mp** 139-140 °C.

**R<sub>f</sub>** 0.1 (50:50 hexane / ethyl acetate).

**<sup>1</sup>H NMR** (300 MHz, CDCl<sub>3</sub>) δ (ppm) 5.76 (dd, J= 2.7 Hz, 1.5 Hz, 1H), 3.92 (s, 2H), 3.51 (t, J=7.2 Hz, 2H), 2.35 (t, J=7.2 Hz, 2H), 1.93 (m, 3H), 1.33 (s, 9H).

**<sup>13</sup>C NMR** (75 MHz, CDCl<sub>3</sub>) δ (ppm) 168.39 (C=O), 165.80 (C=O), 152.33 (C=C), 120.00 (C=C), 52.27 (CH<sub>2</sub>N), 51.19 (C(CH<sub>3</sub>)<sub>3</sub>), 46.68 (CH<sub>2</sub>N), 29.47 (CH<sub>2</sub>), 28.69 (C(CH<sub>3</sub>)<sub>3</sub>), 22.84 (CH<sub>3</sub>).

**IR** γ (cm<sup>-1</sup>) 688.1, 856.2, 1362.9, 1452.2, 1485.9, 1556.3, 1613.4, 1667.5, 2928.4, 2969.6, 3074.1, 3308.7.

**HRMS (FAB<sup>+</sup>)** calcd for C<sub>12</sub>H<sub>20</sub>N<sub>2</sub>O<sub>2</sub>: [M+1] 225.1603 found: 225.1600.
